# Supplementary material for: Enhancement of CO2 binding and mechanical properties upon diamine functionalization of M2(dobpdc) metal–organic frameworks
Source: PubMed Central journal article supplement — Chem Sci. 2018 May 23;9(23):5197–206. doi: 10.1039/c7sc05217k (PMC6001253; doi:10.1039/c7sc05217k), 2018-05-23
Supplement: SC-009-C7SC05217K-s001.pdf [file SC-009-C7SC05217K-s001.pdf]

## Supporting Information for:

### **Enhancement of CO<sub>2</sub> Binding and Mechanical Properties Upon Diamine Functionalization of M<sub>2</sub>(dobpdc) Metal-Organic Frameworks**

Jung-Hoon Lee,<sup>1,2</sup> Rebecca L. Siegelman,<sup>3</sup> Lorenzo Maserati,<sup>1</sup> Tonatiuh Rangel,<sup>1,2</sup>

Brett A. Helms,<sup>1,4</sup> Jeffrey R. Long,<sup>3,4,5</sup> and Jeffrey B. Neaton<sup>1,2,6\*</sup>

<sup>1</sup>Molecular Foundry, Lawrence Berkeley National Laboratory, Berkeley, California  
94720, USA

<sup>2</sup>Department of Physics, University of California, Berkeley, California 94720, USA

<sup>3</sup>Department of Chemistry, University of California, Berkeley, California 94720, USA

<sup>4</sup>Materials Sciences Division, Lawrence Berkeley National Laboratory, Berkeley,  
California 94720, USA

<sup>5</sup>Department of Chemical and Biomolecular Engineering, University of California,  
Berkeley, California 94720, USA

<sup>6</sup>Kavli Energy Nanosciences Institute at Berkeley, Berkeley, California 94720, USA

To whom correspondence should be addressed.

Email: [jbneaton@lbl.gov](mailto:jbneaton@lbl.gov)

## 1. UV Measurements and Computed Band Gaps

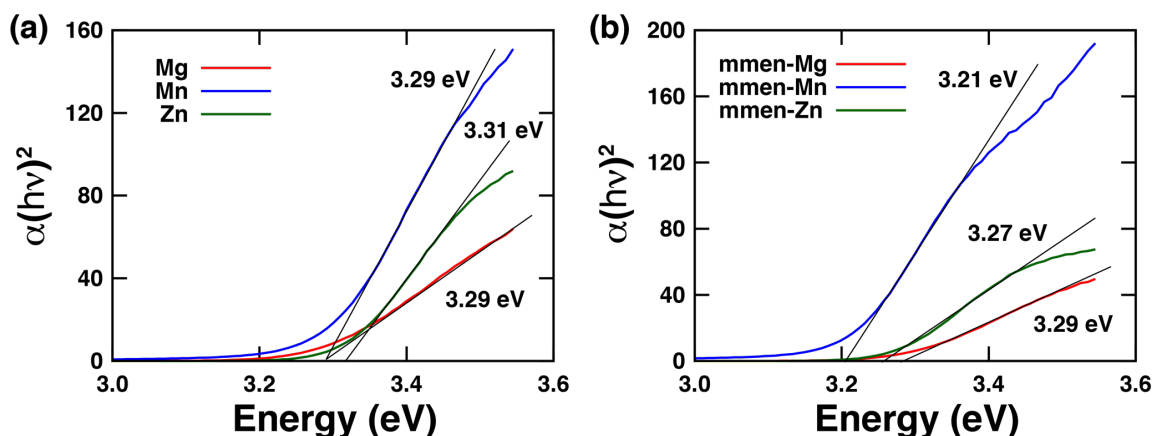

**Fig. S1** Experimentally derived band gaps for (a)  $M_2(\text{dobpdc})$  and (b)  $\text{mmen-}M_2(\text{dobpdc})$  ( $M = \text{Mg, Mn, Zn}$ ). Using the measured reflectance ( $R$ ) from UV-Vis Diffusion Reflectance measurements, the extinction coefficient  $\alpha$  is to be proportional to  $F(R)$ , being  $F(R) = (1-R^2)/2R$ . Considering direct allowed transitions, we have  $\alpha(h\nu)^2 \approx k(h\nu - E_g)$ , where  $h$  is the Planck constant,  $\nu$  is the photon frequency,  $k$  is a the absorption constant,  $E_g$  is the band-gap energy (eV). Plotting  $\alpha(h\nu)^2$  versus the photon energy, we extrapolated  $E_g$  fitting the slope and intersecting it with  $\alpha = 0$ .<sup>1</sup>

### (1) UV-Vis Diffuse Reflectance Measurements

Experimental optical band gaps are determined from diffuse reflectance measurements performed on bulk (powder) MOF samples.  $M_2(\text{dobpdc})$  samples with different metal centers ( $M$ ) are synthesized following a rapid route that we recently reported.<sup>2</sup> For amine-grafted samples, the  $M_2(\text{dobpdc})$  powder is appended with mmen in hexanes prior to activation.<sup>2</sup> Freshly activated samples are loaded into an integrating sphere to perform the diffuse reflectance measurements on a Cary 5000 spectrophotometer. Spectra are acquired in the photon wavelength range 350 to 700 nm. Optical band gaps are determined from the experimental data according to a fitting procedure reported in literature for direct band-gap semiconductor materials, as shown in Fig S1.<sup>1</sup>

## (2) HSE calculations

All computed band gaps are generated from single-point calculations with the HSE06<sup>3</sup> hybrid functional. HSE06 uses a fraction Fock short-range exact exchange ( $\alpha$ ) set to 0.25. For all HSE06 calculations, a  $2 \times 2 \times 3$  Monkhorst-Pack  $k$ -point mesh<sup>4</sup> centered at  $\Gamma$  is used. We also investigate the electronic structure of a H<sub>4</sub>dobpdc molecule within a 17 Å  $\times$  20 Å  $\times$  16 Å supercell using HSE06.

Although the HSE functional does not include electron-hole interactions and is missing important nonlocal correlation effects, the computed band gaps are in good agreement with the measured optical band gaps, as compared in Table S1. It is worth mentioning that the experimentally-measured band gaps are the optical band gaps. In order to accurately predict the quasiparticle or optical gap, we would need an excited-state formalism, such as many-body perturbation theory, e.g., within the GW approximation<sup>5-10</sup> and the Bethe-Salpeter equation approach.<sup>7,11-15</sup> The use of the HSE functional to approximate quasiparticle band gaps often leads to an underestimate.<sup>16</sup> At the same time, the exciton binding energies of porous materials such as MOFs are expected to be large because the valence band maximum (VBM) and conduction band minimum (CBM) states of MOFs are spatially localized on the same subunit of the structure (see Fig. S2). Electron-hole interactions are much stronger in MOFs than in inorganic systems due to reduced screening, and thus the optical band gaps are expected to be much smaller than the quasiparticle band gaps in porous MOFs. Since the HSE functional does not account for electron-hole interactions, and since it typically underestimates the quasiparticle gap, the resultant cancellation of the errors very plausibly leads to fortuitous agreement with experiment in this case.

**Table S1** Computed band gaps  $E_g$  (in eV) of  $M_2(\text{dobpdc})$ ,  $\text{mmen-}M_2(\text{dobpdc})$ , and  $\text{CO}_2\text{-mmen-}M_2(\text{dobpdc})$  ( $M = \text{Mg, Mn, Fe, Co, Zn}$ ) compared to the experimental values.

|                              | $E_g$ of GGA+U | $E_g$ of HSE | $E_g$ of Exp |
|------------------------------|----------------|--------------|--------------|
| Mg                           | 2.49           | 3.55         | 3.29         |
| mmen-Mg                      | 2.68           | 3.66         | 3.29         |
| $\text{CO}_2\text{-mmen-Mg}$ | 2.37           | 3.29         | -            |
| Mn                           | 2.46           | 3.48         | 3.29         |
| mmen-Mn                      | 2.45           | 3.29         | 3.21         |
| $\text{CO}_2\text{-mmen-Mn}$ | 2.31           | 3.09         | -            |
| Fe                           | 2.49           | 3.17         | -            |
| mmen-Fe                      | 2.47           | 2.97         | -            |
| $\text{CO}_2\text{-mmen-Fe}$ | 2.29           | 2.79         | -            |
| Co                           | 2.47           | 3.21         | -            |
| mmen-Co                      | 2.61           | 3.42         | -            |
| $\text{CO}_2\text{-mmen-Co}$ | 2.31           | 3.20         | -            |
| Zn                           | 2.62           | 3.68         | 3.31         |
| mmen-Zn                      | 2.56           | 3.55         | 3.27         |
| $\text{CO}_2\text{-mmen-Zn}$ | 2.50           | 3.49         | -            |

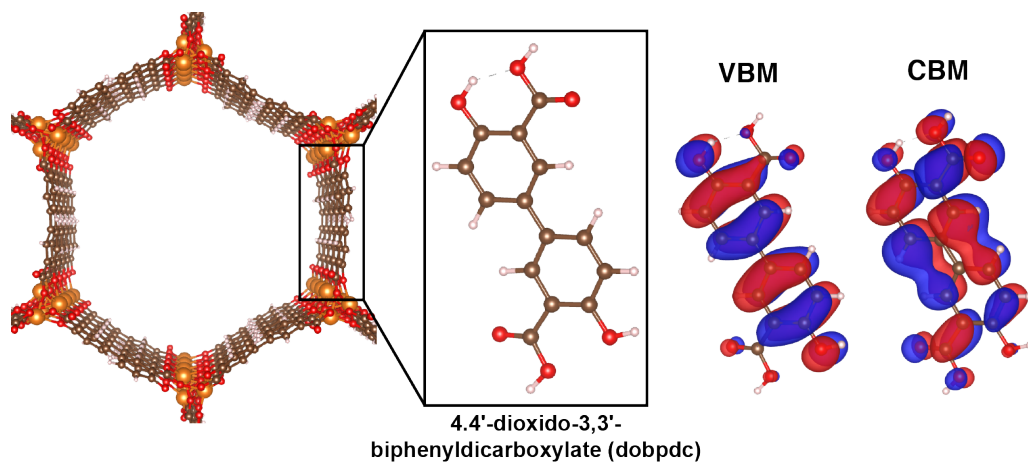

**Fig. S2** 4,4'-dioxidobiphenyl-3,3'-dicarboxylate (dobpdc) linker which is mainly responsible for the band edge states in  $M_2(\text{dobpdc})$  MOFs.

## 2. Computed Kohn-Sham Energies

**Table S2** Computed Kohn-Sham energies (in eV) of all metal-organic frameworks (MOFs) and free molecules.

| MOF                                            | Kohn-Sham energy | Molecule              | Kohn-Sham energy |
|------------------------------------------------|------------------|-----------------------|------------------|
| Mg <sub>2</sub> (dobpdc)                       | -493.916         | CO <sub>2</sub>       | -17.660          |
| mmen–Mg <sub>2</sub> (dobpdc)                  | -1028.408        | H <sub>2</sub> O      | -12.481          |
| CO <sub>2</sub> –mmen–Mg <sub>2</sub> (dobpdc) | -1139.015        | N <sub>2</sub>        | -13.427          |
| Mn <sub>2</sub> (dobpdc)                       | -502.895         | mmen                  | -87.526          |
| mmen–Mn <sub>2</sub> (dobpdc)                  | -1036.976        | CO <sub>2</sub> –mmen | -102.961         |
| CO <sub>2</sub> –mmen–Mn <sub>2</sub> (dobpdc) | -1147.245        |                       |                  |
| Fe <sub>2</sub> (dobpdc)                       | -492.110         |                       |                  |
| mmen–Fe <sub>2</sub> (dobpdc)                  | -1026.795        |                       |                  |
| CO <sub>2</sub> –mmen–Fe <sub>2</sub> (dobpdc) | -1136.254        |                       |                  |
| Co <sub>2</sub> (dobpdc)                       | -481.891         |                       |                  |
| mmen–Co <sub>2</sub> (dobpdc)                  | -1016.633        |                       |                  |
| CO <sub>2</sub> –mmen–Co <sub>2</sub> (dobpdc) | -1125.856        |                       |                  |
| Zn <sub>2</sub> (dobpdc)                       | -461.046         |                       |                  |
| mmen–Zn <sub>2</sub> (dobpdc)                  | -994.835         |                       |                  |
| CO <sub>2</sub> –mmen–Zn <sub>2</sub> (dobpdc) | -1104.677        |                       |                  |

### 3. Computed Vibrational Frequencies

**Table S3** Computed vibrational frequencies for free ( $\nu$ ) and bound ( $\nu'$ ) molecules. The unit is  $\text{cm}^{-1}$ .

| Molecule                                                                | Mode | $\nu$ | $\nu'$ |      |             |             |             |
|-------------------------------------------------------------------------|------|-------|--------|------|-------------|-------------|-------------|
|                                                                         |      |       | Mg     | Mn   | Fe          | Co          | Zn          |
| CO <sub>2</sub>                                                         | 1    | 2295  | 2299   | 2289 | 2288        | 2288        | 2286        |
|                                                                         | 2    | 1291  | 1290   | 1287 | 1287        | 1287        | 1286        |
|                                                                         | 3    | 623   | 617    | 613  | 611         | 612         | 613         |
|                                                                         | 4    | 623   | 607    | 611  | 608         | 609         | 611         |
|                                                                         | 5    |       | 148    | 121  | 139         | 130         | 115         |
|                                                                         | 6    |       | 105    | 85   | 93          | 86          | 74          |
|                                                                         | 7    |       | 83     | 80   | 81          | 75          | 61          |
|                                                                         | 8    |       | 31     | 44   | 56          | 44          | 13          |
|                                                                         | 9    |       | 4      | 28   | 38          | 29          | 19 <i>i</i> |
| H <sub>2</sub> O                                                        | 1    | 3758  | 3737   | 3732 | 3724        | 3732        | 3731        |
|                                                                         | 2    | 3658  | 3643   | 3634 | 3625        | 3632        | 3628        |
|                                                                         | 3    | 1636  | 1619   | 1613 | 1613        | 1607        | 1612        |
|                                                                         | 4    |       | 469    | 445  | 461         | 479         | 431         |
|                                                                         | 5    |       | 385    | 375  | 411         | 417         | 373         |
|                                                                         | 6    |       | 210    | 194  | 196         | 197         | 164         |
|                                                                         | 7    |       | 128    | 108  | 109         | 112         | 114         |
|                                                                         | 8    |       | 112    | 81   | 75          | 98          | 96          |
|                                                                         | 9    |       | 61     | 37   | 56          | 69          | 79          |
| N <sub>2</sub>                                                          | 1    | 2554  | 2417   | 2411 | 2409        | 2406        | 2407        |
|                                                                         | 2    |       | 164    | 107  | 133         | 132         | 87          |
|                                                                         | 3    |       | 143    | 96   | 118         | 114         | 77          |
|                                                                         | 4    |       | 101    | 83   | 87          | 72          | 59          |
|                                                                         | 5    |       | 33     | 22   | 33          | 28          | 24          |
|                                                                         | 6    |       | 28     | 9    | 11 <i>i</i> | 28 <i>i</i> | 12 <i>i</i> |
| mmen<br>(C <sub>4</sub> H <sub>10</sub> N <sub>2</sub> H <sub>2</sub> ) | 1    | 3368  | 3383   | 3401 | 3380        | 3378        | 3395        |
|                                                                         | 2    | 3121  | 3100   | 3091 | 3086        | 3073        | 3308        |
|                                                                         | 3    | 3055  | 3072   | 3073 | 3073        | 3059        | 3068        |
|                                                                         | 4    | 3034  | 3055   | 3028 | 3044        | 3045        | 3042        |
|                                                                         | 5    | 3014  | 3025   | 3007 | 3026        | 3023        | 3032        |
|                                                                         | 6    | 3006  | 3006   | 2997 | 3009        | 3006        | 3023        |
|                                                                         | 7    | 2986  | 3003   | 2986 | 2995        | 2998        | 2989        |
|                                                                         | 8    | 2973  | 2974   | 2966 | 2974        | 2977        | 2983        |
|                                                                         | 9    | 2970  | 2972   | 2941 | 2971        | 2972        | 2972        |
|                                                                         | 10   | 2907  | 2919   | 2914 | 2917        | 2920        | 2953        |
|                                                                         | 11   | 2900  | 2909   | 2896 | 2915        | 2913        | 2944        |
|                                                                         | 12   | 2857  | 2868   | 2857 | 2862        | 2864        | 2849        |
|                                                                         | 13   | 1512  | 1512   | 1513 | 1512        | 1512        | 1508        |
|                                                                         | 14   | 1508  | 1503   | 1502 | 1504        | 1507        | 1506        |
|                                                                         | 15   | 1500  | 1497   | 1496 | 1500        | 1501        | 1497        |
|                                                                         | 16   | 1489  | 1492   | 1493 | 1491        | 1492        | 1489        |

|    |      |      |      |      |      |      |
|----|------|------|------|------|------|------|
| 17 | 1483 | 1482 | 1485 | 1483 | 1485 | 1481 |
| 18 | 1480 | 1482 | 1480 | 1481 | 1481 | 1478 |
| 19 | 1474 | 1469 | 1475 | 1471 | 1473 | 1471 |
| 20 | 1468 | 1464 | 1467 | 1462 | 1463 | 1461 |
| 21 | 1444 | 1440 | 1441 | 1440 | 1440 | 1445 |
| 22 | 1434 | 1437 | 1434 | 1437 | 1436 | 1437 |
| 23 | 1384 | 1386 | 1381 | 1387 | 1388 | 1382 |
| 24 | 1332 | 1338 | 1336 | 1337 | 1340 | 1363 |
| 25 | 1319 | 1334 | 1328 | 1333 | 1333 | 1305 |
| 26 | 1274 | 1281 | 1280 | 1282 | 1283 | 1263 |
| 27 | 1204 | 1212 | 1210 | 1211 | 1215 | 1203 |
| 28 | 1144 | 1194 | 1202 | 1191 | 1200 | 1178 |
| 29 | 1135 | 1139 | 1141 | 1139 | 1140 | 1140 |
| 30 | 1115 | 1124 | 1130 | 1125 | 1128 | 1128 |
| 31 | 1074 | 1078 | 1080 | 1078 | 1079 | 1072 |
| 32 | 1028 | 1059 | 1062 | 1064 | 1074 | 1045 |
| 33 | 1009 | 1025 | 1042 | 1030 | 1031 | 1019 |
| 34 | 983  | 992  | 1010 | 999  | 1001 | 990  |
| 35 | 917  | 951  | 943  | 951  | 956  | 955  |
| 36 | 900  | 916  | 906  | 915  | 918  | 921  |
| 37 | 820  | 844  | 847  | 849  | 851  | 849  |
| 38 | 769  | 786  | 790  | 786  | 786  | 794  |
| 39 | 714  | 743  | 755  | 749  | 756  | 714  |
| 40 | 503  | 525  | 532  | 527  | 535  | 565  |
| 41 | 404  | 429  | 428  | 425  | 432  | 428  |
| 42 | 346  | 412  | 404  | 416  | 422  | 386  |
| 43 | 307  | 339  | 347  | 343  | 347  | 320  |
| 44 | 252  | 259  | 284  | 265  | 270  | 254  |
| 45 | 230  | 244  | 244  | 248  | 255  | 226  |
| 46 | 143  | 203  | 193  | 205  | 217  | 219  |
| 47 | 124  | 187  | 180  | 179  | 189  | 189  |
| 48 | 63   | 168  | 162  | 163  | 173  | 168  |
| 49 |      | 142  | 159  | 145  | 149  | 142  |
| 50 |      | 123  | 130  | 124  | 130  | 108  |
| 51 |      | 92   | 108  | 94   | 98   | 88   |
| 52 |      | 83   | 69   | 80   | 83   | 75   |
| 53 |      | 63   | 54   | 62   | 68   | 55   |
| 54 |      | 48   | 36   | 38   | 53   | 38   |

---

|                                                                                 |   |      |      |      |      |      |      |
|---------------------------------------------------------------------------------|---|------|------|------|------|------|------|
| CO <sub>2</sub> -mmen                                                           | 1 | 3112 | 3094 | 3093 | 3091 | 3090 | 3093 |
| (C <sub>4</sub> H <sub>10</sub> N <sub>2</sub> H <sub>2</sub> CO <sub>2</sub> ) | 2 | 3089 | 3075 | 3077 | 3078 | 3077 | 3071 |
|                                                                                 | 3 | 3071 | 3058 | 3058 | 3067 | 3056 | 3050 |
|                                                                                 | 4 | 3068 | 3056 | 3037 | 3052 | 3045 | 3038 |
|                                                                                 | 5 | 3038 | 3043 | 3023 | 3039 | 3036 | 3020 |
|                                                                                 | 6 | 3011 | 3017 | 3017 | 3018 | 3020 | 2995 |
|                                                                                 | 7 | 2995 | 2987 | 2987 | 2989 | 2987 | 2980 |
|                                                                                 | 8 | 2982 | 2973 | 2982 | 2978 | 2978 | 2974 |

|    |      |      |      |      |      |      |
|----|------|------|------|------|------|------|
| 9  | 2956 | 2969 | 2973 | 2973 | 2973 | 2971 |
| 10 | 2935 | 2958 | 2966 | 2966 | 2968 | 2950 |
| 11 | 2897 | 2918 | 2918 | 2916 | 2915 | 2916 |
| 12 | 2707 | 2454 | 2503 | 2448 | 2465 | 2594 |
| 13 | 1645 | 1678 | 1678 | 1676 | 1676 | 1676 |
| 14 | 1503 | 1567 | 1563 | 1567 | 1568 | 1561 |
| 15 | 1500 | 1504 | 1504 | 1503 | 1504 | 1506 |
| 16 | 1495 | 1500 | 1500 | 1500 | 1500 | 1500 |
| 17 | 1491 | 1489 | 1491 | 1490 | 1490 | 1491 |
| 18 | 1487 | 1486 | 1485 | 1485 | 1486 | 1486 |
| 19 | 1468 | 1484 | 1483 | 1483 | 1483 | 1485 |
| 20 | 1450 | 1479 | 1479 | 1477 | 1479 | 1482 |
| 21 | 1438 | 1474 | 1473 | 1472 | 1472 | 1475 |
| 22 | 1429 | 1457 | 1455 | 1453 | 1453 | 1453 |
| 23 | 1402 | 1441 | 1439 | 1439 | 1440 | 1440 |
| 24 | 1374 | 1426 | 1420 | 1418 | 1417 | 1413 |
| 25 | 1367 | 1399 | 1397 | 1396 | 1398 | 1396 |
| 26 | 1339 | 1365 | 1358 | 1359 | 1360 | 1361 |
| 27 | 1320 | 1338 | 1336 | 1335 | 1336 | 1332 |
| 28 | 1302 | 1318 | 1315 | 1314 | 1314 | 1314 |
| 29 | 1257 | 1264 | 1264 | 1261 | 1261 | 1263 |
| 30 | 1180 | 1223 | 1217 | 1216 | 1215 | 1212 |
| 31 | 1172 | 1210 | 1208 | 1210 | 1209 | 1208 |
| 32 | 1157 | 1168 | 1165 | 1167 | 1168 | 1170 |
| 33 | 1129 | 1135 | 1131 | 1132 | 1132 | 1133 |
| 34 | 1082 | 1112 | 1108 | 1108 | 1109 | 1110 |
| 35 | 1013 | 1039 | 1036 | 1037 | 1036 | 1036 |
| 36 | 995  | 1015 | 1010 | 1013 | 1015 | 1014 |
| 37 | 962  | 1004 | 999  | 1000 | 1001 | 1000 |
| 38 | 955  | 973  | 970  | 973  | 975  | 976  |
| 39 | 889  | 933  | 940  | 932  | 932  | 936  |
| 40 | 856  | 914  | 911  | 914  | 916  | 914  |
| 41 | 783  | 816  | 811  | 811  | 811  | 812  |
| 42 | 755  | 781  | 779  | 779  | 779  | 782  |
| 43 | 749  | 761  | 759  | 761  | 761  | 760  |
| 44 | 598  | 628  | 626  | 626  | 627  | 624  |
| 45 | 558  | 578  | 573  | 574  | 574  | 572  |
| 46 | 410  | 458  | 452  | 455  | 458  | 453  |
| 47 | 387  | 419  | 421  | 419  | 420  | 415  |
| 48 | 349  | 384  | 375  | 377  | 379  | 373  |
| 49 | 279  | 323  | 318  | 321  | 323  | 322  |
| 50 | 250  | 287  | 282  | 282  | 285  | 283  |
| 51 | 188  | 250  | 248  | 248  | 250  | 253  |
| 52 | 181  | 231  | 226  | 220  | 223  | 226  |
| 53 | 137  | 218  | 209  | 210  | 212  | 210  |
| 54 | 111  | 172  | 161  | 164  | 170  | 170  |



|    |    |     |     |     |     |     |
|----|----|-----|-----|-----|-----|-----|
| 55 | 86 | 151 | 141 | 143 | 144 | 147 |
| 56 | 34 | 131 | 123 | 125 | 129 | 127 |
| 57 | 5  | 124 | 118 | 118 | 119 | 119 |
| 58 |    | 109 | 104 | 103 | 105 | 104 |
| 59 |    | 104 | 94  | 96  | 97  | 94  |
| 60 |    | 78  | 66  | 63  | 70  | 70  |
| 61 |    | 59  | 52  | 55  | 54  | 64  |
| 62 |    | 52  | 48  | 43  | 50  | 50  |
| 63 |    | 46  | 36  | 41  | 35  | 47  |

**Table S4** Computed vibrational frequencies of bound H<sub>2</sub>O in Mg<sub>2</sub>(dobpdc) for different kinetic energy cutoffs (KE), force criteria (F), and convergence thresholds for self-consistency (CT). The unit is cm<sup>-1</sup>. Imaginary frequencies are indicated by red.

| Mode | KE: 600 eV<br>F: 0.02 eV/Å<br>CT: 10 <sup>-5</sup> eV | 600 eV<br>0.01 eV/Å<br>10 <sup>-5</sup> eV | 1000 eV<br>0.02 eV/Å<br>10 <sup>-5</sup> eV | 1000 eV<br>0.01 eV/Å<br>10 <sup>-5</sup> eV | 600 eV<br>0.02 eV/Å<br>10 <sup>-8</sup> eV |
|------|-------------------------------------------------------|--------------------------------------------|---------------------------------------------|---------------------------------------------|--------------------------------------------|
| 1    | 3737                                                  | 3734                                       | 3742                                        | 3743                                        | 3737                                       |
| 2    | 3643                                                  | 3640                                       | 3651                                        | 3652                                        | 3643                                       |
| 3    | 1605                                                  | 1606                                       | 1599                                        | 1598                                        | 1619                                       |
| 4    | 444                                                   | 426                                        | 417                                         | 414                                         | 469                                        |
| 5    | 370                                                   | 347                                        | 364                                         | 358                                         | 385                                        |
| 6    | 206                                                   | 203                                        | 198                                         | 195                                         | 210                                        |
| 7    | 118                                                   | 63                                         | 112                                         | 110                                         | 128                                        |
| 8    | <i>66i</i>                                            | <i>135i</i>                                | <i>80i</i>                                  | <i>85i</i>                                  | 112                                        |
| 9    | <i>214i</i>                                           | <i>265i</i>                                | <i>211i</i>                                 | <i>211i</i>                                 | 61                                         |

## 4. Zero-Point and Thermal Energy Corrections

### (1) Zero-point energy

Due to the uncertainty principles, small gas molecules fluctuate even at 0 K. This quantum mechanical behavior increases the ground state energy by  $\hbar\omega_{vib}/2$  where  $\hbar$  is Planck's constant divided by  $2\pi$ , and  $\omega_{vib}$  is the vibrational frequency. Therefore, in order to accurately predict binding energies of small gas molecules, we need to consider zero-point energy (ZPE) and add this number to the calculated Kohn-Sham energy. The total ZPE contribution can be expressed as

$$ZPE = \sum_{vib} \frac{\hbar\omega_{vib}}{2} . \quad (9)$$

The ZPE correction (ZPEC) can be then obtained via the difference between the ZPEs of free and bound molecules.

$$ZPEC = \sum_{vib,bound} \frac{\hbar\omega_{vib,bound}}{2} - \sum_{vib,free} \frac{\hbar\omega_{vib,free}}{2} . \quad (10)$$

Using the computed vibrational frequencies of free and bound molecules given in Table S2, we can get the ZPEC for all molecules as shown in Table S4.

**Table S5** Computed ZPEC (in kJ/mol) for CO<sub>2</sub>, H<sub>2</sub>O, N<sub>2</sub>, mmen, and CO<sub>2</sub>-mmen molecules.

|                       | Mg   | Mn  | Fe  | Co  | Zn   |
|-----------------------|------|-----|-----|-----|------|
| CO <sub>2</sub>       | 2.1  | 2.0 | 2.2 | 2.0 | 1.5  |
| H <sub>2</sub> O      | 7.9  | 7.0 | 7.3 | 7.7 | 7.0  |
| N <sub>2</sub>        | 2.0  | 1.0 | 1.4 | 1.4 | 0.7  |
| mmen                  | 7.8  | 7.4 | 7.7 | 8.6 | 8.6  |
| CO <sub>2</sub> -mmen | 10.7 | 9.7 | 9.6 | 9.9 | 10.1 |

## (2) Thermal energy

The thermal energy (TE) correction arises from with the internal kinetic energy caused by the random motion of free molecules including vibrational, translational, and rotational degrees of freedom. Thus, TE correction is proportional to the temperature and can be expressed as

$$TE_{free}(T) = \sum_{trans,rot} \frac{1}{2}k_B T + \sum_{vib} \frac{\hbar\omega_{vib}}{e^{\frac{\hbar\omega_{vib}}{k_B T}} - 1}, \quad (11)$$

where  $k_B$  is Boltzmann constant, and  $T$  is the temperature. For the bound molecules, the TE is

$$TE_{bound}(T) = \sum_{vib} \frac{\hbar\omega_{vib}}{e^{\frac{\hbar\omega_{vib}}{k_B T}} - 1}, \quad (12)$$

since the translational and rotational degrees of freedom are no longer applicable. Then the TE correction (TEC) is calculated as:

$$TEC(T) = TE_{bound}(T) - TE_{free}(T) \quad (13)$$

Using the computed vibrational frequencies of free and bound molecules given in Table S2, we can get the TEC for all molecules as shown in Table S5.

**Table S6** Computed TEC (in kJ/mol) for CO<sub>2</sub>, H<sub>2</sub>O, N<sub>2</sub>, mmen, and CO<sub>2</sub>-mmen molecules.

|                       | Mg   | Mn   | Fe   | Co   | Zn   |
|-----------------------|------|------|------|------|------|
| CO <sub>2</sub>       | 1.7  | 1.8  | 1.5  | 1.7  | 2.2  |
| H <sub>2</sub> O      | -1.2 | -0.7 | -0.9 | -1.1 | -0.8 |
| N <sub>2</sub>        | 1.2  | 2.0  | 1.6  | 1.7  | 2.3  |
| mmen                  | 0.2  | 0.3  | 0.3  | -0.1 | 0.6  |
| CO <sub>2</sub> -mmen | -0.9 | -0.4 | -0.4 | -0.6 | -0.6 |

## 5. Mechanical Properties

### (1) Voigt-Reuss-Hill (VRH) average

The orientationally-averaged Young's modulus  $E$ , bulk modulus  $B$ , shear modulus  $G$ , and Poisson's ratio  $\nu$  can be estimated using the VRH average.<sup>17</sup>

$$B_V = \frac{1}{9} [(C_{11} + C_{22} + C_{33}) + 2(C_{12} + C_{13} + C_{23})] \quad (1)$$

$$B_R = \frac{1}{(S_{11} + S_{22} + S_{33}) + 2(S_{12} + S_{13} + S_{23})} \quad (2)$$

$$G_V = \frac{1}{15} [(C_{11} + C_{22} + C_{33}) - (C_{12} + C_{13} + C_{23}) + 3(C_{44} + C_{55} + C_{66})] \quad (3)$$

$$G_R = \frac{15}{4(S_{11} + S_{22} + S_{33}) - 4(S_{12} + S_{13} + S_{23}) + 3(S_{44} + S_{55} + S_{66})} \quad (4)$$

$$B = B_{VRH} = \frac{B_R + B_V}{2} \quad (5)$$

$$G = G_{VRH} = \frac{G_R + G_V}{2} \quad (6)$$

$$E = E_{VRH} = \frac{9B_{VRH}G_{VRH}}{3B_{VRH} + G_{VRH}} \quad (7)$$

$$\nu = \nu_{VRH} = \frac{3B_{VRH} - 2G_{VRH}}{6B_{VRH} + 2G_{VRH}} \quad (8)$$

where subscript V and R indicate the Voigt and Reuss average<sup>18,19</sup> by which the orientationally-averaged bulk modulus can be determined, indicating the upper and lower bound of the modulus for a polycrystalline material.

### (2) Two strain types

Two different strain types ( $\varepsilon_1$  and  $\varepsilon_{3+4}$ ) were calculated for  $M_2(\text{dobpdc})$ ,  $\text{mmen-}M_2(\text{dobpdc})$ , and  $\text{CO}_2\text{-mmen-}M_2(\text{dobpdc})$  ( $M = \text{Mg, Mn, Fe, Co, Zn}$ ).  $\delta$  indicates a strain.

$$\varepsilon_1 = \begin{bmatrix} 1 + \delta & 0 & 0 \\ 0 & 1 & 0 \\ 0 & 0 & 1 \end{bmatrix}$$

$$\varepsilon_{3+4} = \begin{bmatrix} 1 & 0 & 0 \\ 0 & 1 & \delta/2 \\ 0 & \delta/2 & 1 + \delta \end{bmatrix}$$

### (3) Elastic moduli ( $C_{ij}$ )

$$C_{ij}[Mg_2(dobpdc)] = \begin{bmatrix} 15.96 & 13.93 & 3.84 & 0 & 0 & 0 \\ 13.93 & 15.96 & 3.84 & 0 & 0 & 0 \\ 3.84 & 3.84 & 17.01 & 0 & 0 & 0 \\ 0 & 0 & 0 & 6.35 & 0 & 0 \\ 0 & 0 & 0 & 0 & 6.35 & 0 \\ 0 & 0 & 0 & 0 & 0 & 1.02 \end{bmatrix}$$

$$C_{ij}[Mn_2(dobpdc)] = \begin{bmatrix} 19.97 & 19.23 & 6.47 & 0 & 0 & 0 \\ 19.23 & 19.97 & 6.47 & 0 & 0 & 0 \\ 6.47 & 6.47 & 13.19 & 0 & 0 & 0 \\ 0 & 0 & 0 & 5.59 & 0 & 0 \\ 0 & 0 & 0 & 0 & 5.59 & 0 \\ 0 & 0 & 0 & 0 & 0 & 0.37 \end{bmatrix}$$

$$C_{ij}[Fe_2(dobpdc)] = \begin{bmatrix} 16.98 & 14.87 & 3.66 & 0 & 0 & 0 \\ 14.87 & 16.98 & 3.66 & 0 & 0 & 0 \\ 3.66 & 3.66 & 13.19 & 0 & 0 & 0 \\ 0 & 0 & 0 & 5.93 & 0 & 0 \\ 0 & 0 & 0 & 0 & 5.93 & 0 \\ 0 & 0 & 0 & 0 & 0 & 1.06 \end{bmatrix}$$

$$C_{ij}[Co_2(dobpdc)] = \begin{bmatrix} 13.69 & 12.85 & 2.90 & 0 & 0 & 0 \\ 12.85 & 13.69 & 2.90 & 0 & 0 & 0 \\ 2.90 & 2.90 & 13.19 & 0 & 0 & 0 \\ 0 & 0 & 0 & 6.34 & 0 & 0 \\ 0 & 0 & 0 & 0 & 6.34 & 0 \\ 0 & 0 & 0 & 0 & 0 & 0.42 \end{bmatrix}$$

$$C_{ij}[Zn_2(dobpdc)] = \begin{bmatrix} 16.93 & 15.55 & 5.33 & 0 & 0 & 0 \\ 15.55 & 16.93 & 5.33 & 0 & 0 & 0 \\ 5.33 & 5.33 & 12.42 & 0 & 0 & 0 \\ 0 & 0 & 0 & 5.21 & 0 & 0 \\ 0 & 0 & 0 & 0 & 5.93 & 0 \\ 0 & 0 & 0 & 0 & 0 & 0.69 \end{bmatrix}$$

$$C_{ij}[mmen - Mg_2(dobpdc)] = \begin{bmatrix} 17.20 & 10.66 & 4.58 & 0 & 0 & 0 \\ 10.66 & 17.20 & 4.58 & 0 & 0 & 0 \\ 4.58 & 4.58 & 20.54 & 0 & 0 & 0 \\ & 0 & 0 & 0 & 7.57 & 0 \\ & 0 & 0 & 0 & 0 & 7.57 \\ & 0 & 0 & 0 & 0 & 0 \\ & 0 & 0 & 0 & 0 & 3.27 \end{bmatrix}$$

$$C_{ij}[mmen - Mn_2(dobpdc)] = \begin{bmatrix} 20.09 & 15.78 & 2.79 & 0 & 0 & 0 \\ 15.78 & 20.09 & 2.79 & 0 & 0 & 0 \\ 2.79 & 2.79 & 15.69 & 0 & 0 & 0 \\ & 0 & 0 & 0 & 4.81 & 0 \\ & 0 & 0 & 0 & 0 & 4.81 \\ & 0 & 0 & 0 & 0 & 0 \\ & 0 & 0 & 0 & 0 & 2.15 \end{bmatrix}$$

$$C_{ij}[mmen - Fe_2(dobpdc)] = \begin{bmatrix} 17.93 & 11.02 & 3.60 & 0 & 0 & 0 \\ 11.02 & 17.93 & 3.60 & 0 & 0 & 0 \\ 3.60 & 3.60 & 15.68 & 0 & 0 & 0 \\ & 0 & 0 & 0 & 7.05 & 0 \\ & 0 & 0 & 0 & 0 & 7.05 \\ & 0 & 0 & 0 & 0 & 0 \\ & 0 & 0 & 0 & 0 & 3.45 \end{bmatrix}$$

$$C_{ij}[mmen - Co_2(dobpdc)] = \begin{bmatrix} 12.40 & 9.09 & 2.65 & 0 & 0 & 0 \\ 9.09 & 12.40 & 2.65 & 0 & 0 & 0 \\ 2.65 & 2.65 & 20.61 & 0 & 0 & 0 \\ & 0 & 0 & 0 & 7.00 & 0 \\ & 0 & 0 & 0 & 0 & 7.00 \\ & 0 & 0 & 0 & 0 & 0 \\ & 0 & 0 & 0 & 0 & 1.65 \end{bmatrix}$$

$$C_{ij}[mmen - Zn_2(dobpdc)] = \begin{bmatrix} 20.58 & 13.45 & 6.70 & 0 & 0 & 0 \\ 13.45 & 20.58 & 6.70 & 0 & 0 & 0 \\ 6.70 & 6.70 & 22.75 & 0 & 0 & 0 \\ & 0 & 0 & 0 & 6.86 & 0 \\ & 0 & 0 & 0 & 0 & 6.86 \\ & 0 & 0 & 0 & 0 & 0 \\ & 0 & 0 & 0 & 0 & 3.56 \end{bmatrix}$$

$$C_{ij}[CO_2 - mmen - Mg_2(dobpdc)] = \begin{bmatrix} 21.46 & 15.27 & 6.65 & 0 & 0 & 0 \\ 15.27 & 21.46 & 6.65 & 0 & 0 & 0 \\ 6.65 & 6.65 & 30.57 & 0 & 0 & 0 \\ & 0 & 0 & 0 & 9.50 & 0 \\ & 0 & 0 & 0 & 0 & 9.50 \\ & 0 & 0 & 0 & 0 & 0 \\ & 0 & 0 & 0 & 0 & 3.10 \end{bmatrix}$$

$$C_{ij}[CO_2 - mmen - Mn_2(dobpdc)] = \begin{bmatrix} 20.99 & 12.59 & 8.48 & 0 & 0 & 0 \\ 12.59 & 20.99 & 8.48 & 0 & 0 & 0 \\ 8.48 & 8.48 & 22.04 & 0 & 0 & 0 \\ & 0 & 0 & 0 & 7.48 & 0 \\ & 0 & 0 & 0 & 0 & 7.48 \\ & 0 & 0 & 0 & 0 & 0 \\ & 0 & 0 & 0 & 0 & 1.06 \end{bmatrix}$$

$$C_{ij}[CO_2 - mmen - Fe_2(dobpdc)] = \begin{bmatrix} 18.85 & 14.05 & 8.51 & 0 & 0 & 0 \\ 14.05 & 18.85 & 8.51 & 0 & 0 & 0 \\ 8.51 & 8.51 & 28.50 & 0 & 0 & 0 \\ & 0 & 0 & 0 & 7.92 & 0 \\ & 0 & 0 & 0 & 0 & 7.92 \\ & 0 & 0 & 0 & 0 & 0 & 2.40 \end{bmatrix}$$

$$C_{ij}[CO_2 - mmen - Co_2(dobpdc)] = \begin{bmatrix} 18.64 & 13.01 & 7.58 & 0 & 0 & 0 \\ 13.01 & 18.64 & 7.58 & 0 & 0 & 0 \\ 7.58 & 7.58 & 28.25 & 0 & 0 & 0 \\ & 0 & 0 & 0 & 8.95 & 0 \\ & 0 & 0 & 0 & 0 & 8.95 \\ & 0 & 0 & 0 & 0 & 0 & 2.82 \end{bmatrix}$$

$$C_{ij}[CO_2 - mmen - Zn_2(dobpdc)] = \begin{bmatrix} 22.81 & 15.93 & 10.22 & 0 & 0 & 0 \\ 15.93 & 22.81 & 10.22 & 0 & 0 & 0 \\ 10.22 & 10.22 & 20.70 & 0 & 0 & 0 \\ & 0 & 0 & 0 & 7.07 & 0 \\ & 0 & 0 & 0 & 0 & 7.07 \\ & 0 & 0 & 0 & 0 & 0 & 3.44 \end{bmatrix}$$

## 6. Disordered mmen and CO<sub>2</sub>-mmen units

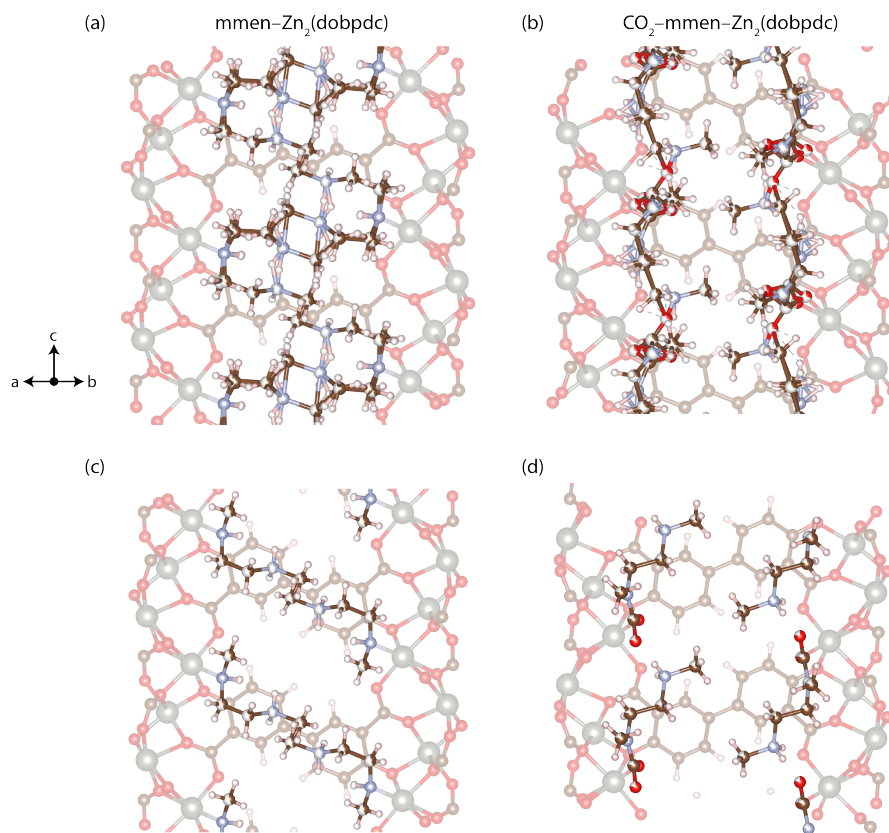

**Fig. S3** Experimentally-determined X-ray diffraction crystal structures of (a) mmen-Zn<sub>2</sub>(dobpdc) and (b) CO<sub>2</sub>-mmen-Zn<sub>2</sub>(dobpdc). mmen and CO<sub>2</sub>-mmen units are disordered. Possible (c) mmen and (d) CO<sub>2</sub>-mmen orderings in mmen-Zn<sub>2</sub>(dobpdc) and CO<sub>2</sub>-mmen-Zn<sub>2</sub>(dobpdc).

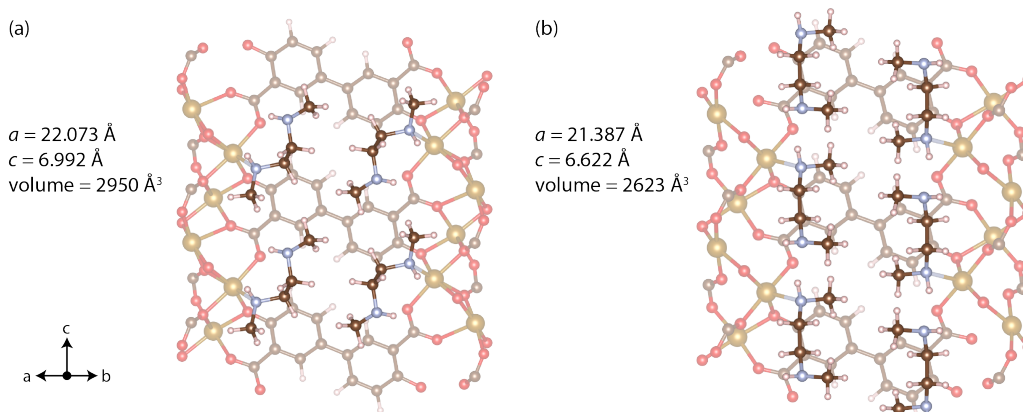

**Fig. S4** Two different mmen orderings in mmen-Fe<sub>2</sub>(dobpdc) with different optimized lattice parameters and unit cell volumes. A structure in (b) is obtained from the previous *ab-initio* molecular dynamics studies.<sup>20,21</sup>



## 7. Powder diffraction patterns

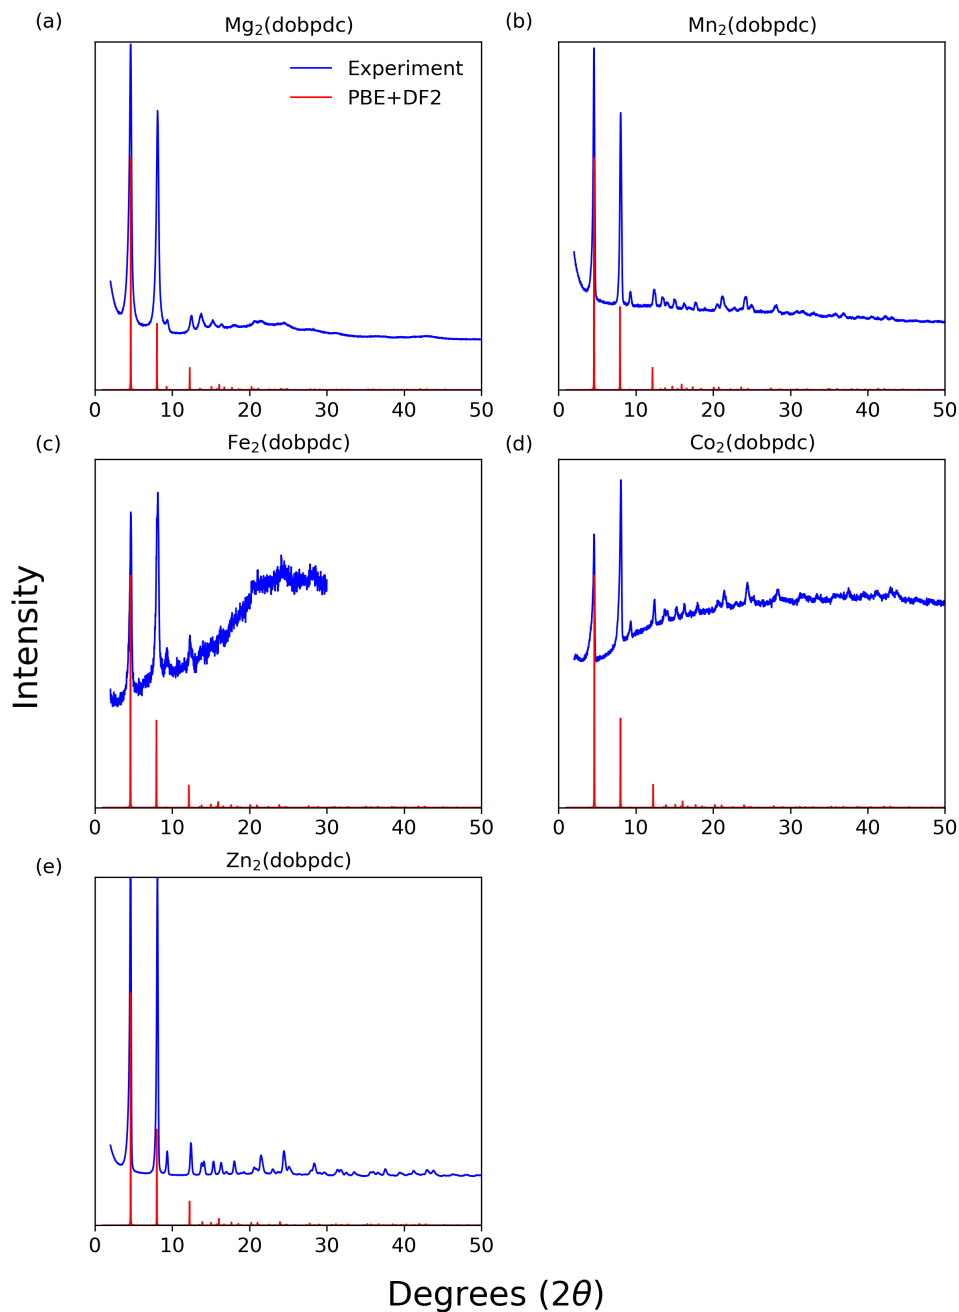

**Fig. S5** Powder diffraction patterns of the optimized (a)  $Mg_2(dobpdc)$ , (b)  $Mn_2(dobpdc)$ , (c)  $Fe_2(dobpdc)$ , (d)  $Co_2(dobpdc)$ , and (e)  $Zn_2(dobpdc)$  structures compared to the experimental powder diffractions collected at 298 K with  $\lambda = 1.5418 \text{ \AA}$ .<sup>22</sup> The experimental curves (blue curves) are taken from Ref. 22.

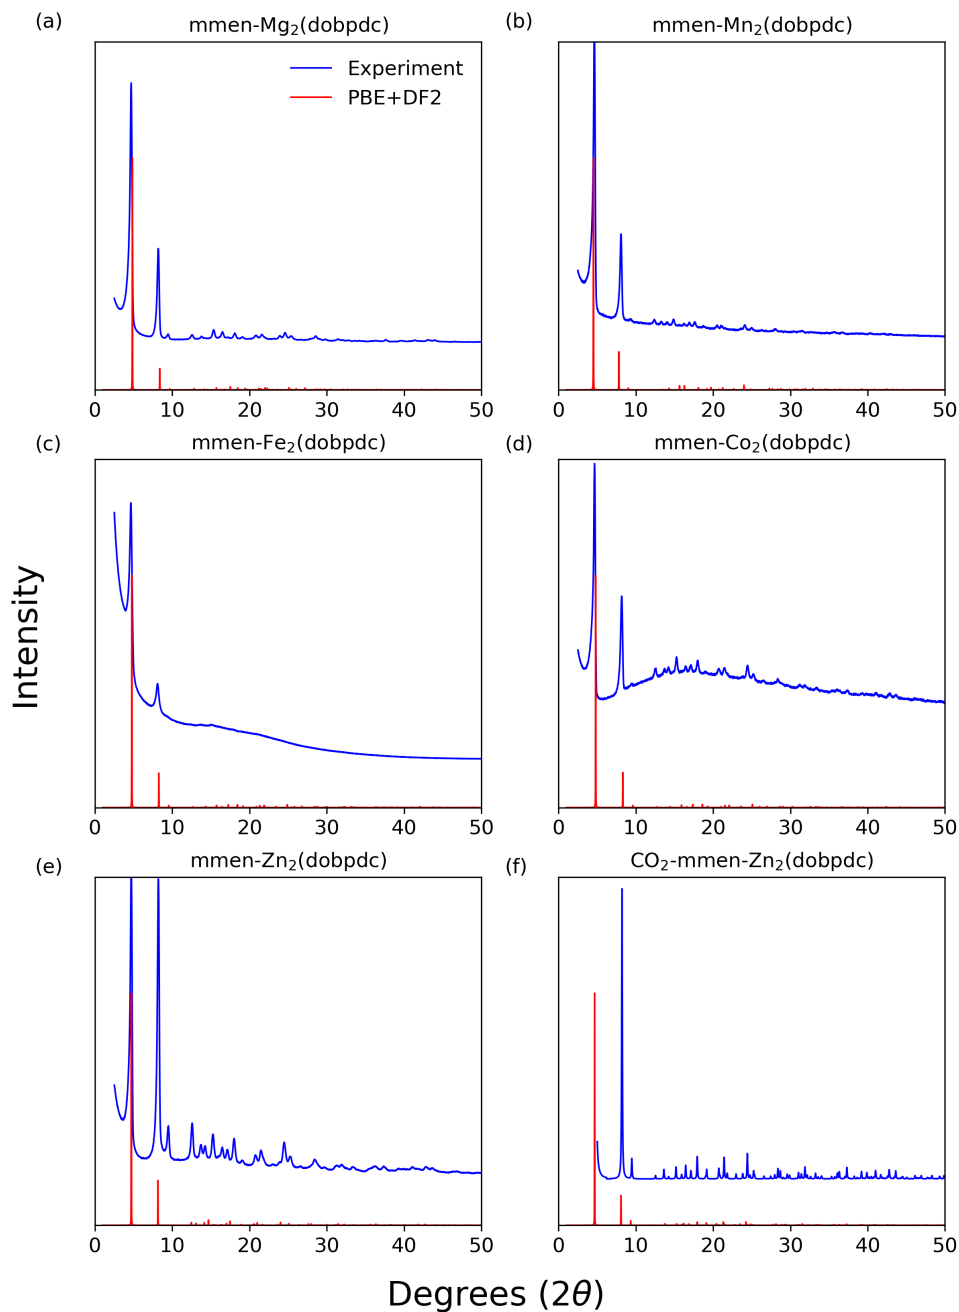

**Fig. S6** Powder diffraction patterns of the optimized (a)  $\text{mmen-Mg}_2(\text{dobpdc})$ , (b)  $\text{mmen-Mn}_2(\text{dobpdc})$ , (c)  $\text{mmen-Fe}_2(\text{dobpdc})$ , (d)  $\text{mmen-Co}_2(\text{dobpdc})$ , (e)  $\text{mmen-Zn}_2(\text{dobpdc})$ , and (f)  $\text{CO}_2\text{-mmen-Zn}_2(\text{dobpdc})$  structures compared to the experimental powder diffractions collected at 298 K with  $\lambda = 1.5406 \text{ \AA}$ .<sup>20,23</sup> The experimental curves (blue curves) are taken from Ref. 20 and 23.

## 8. Potential curves

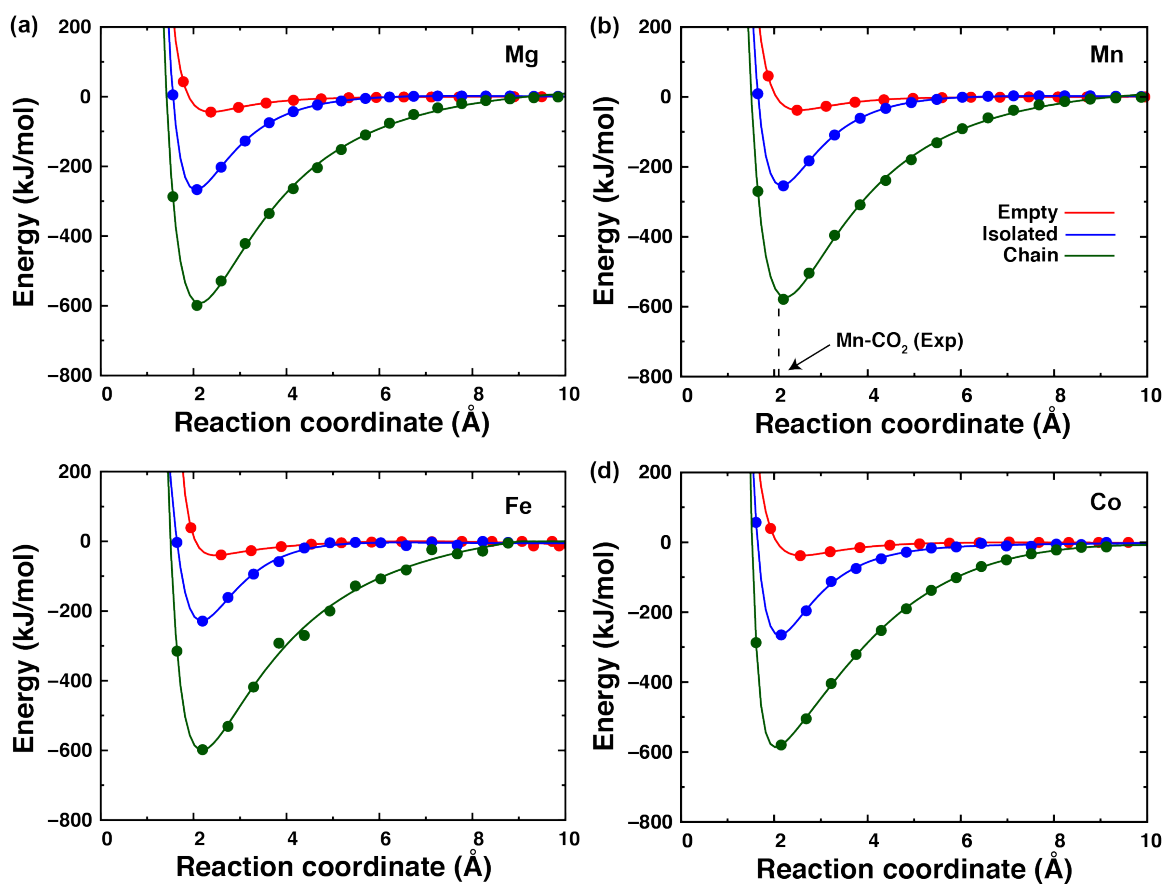

**Fig S7** Potential curves of Empty, Isolated, and Chain geometries for (a) Mg<sub>2</sub>(dobpdc), (b) Mn<sub>2</sub>(dobpdc), (c) Fe<sub>2</sub>(dobpdc), and (d) Co<sub>2</sub>(dobpdc). The experimental Mn-CO<sub>2</sub> distance is indicated by the dotted line.

## 9. Charge Density Difference ( $\Delta\rho$ ) for CO<sub>2</sub> in Zn<sub>2</sub>(dobpdc)

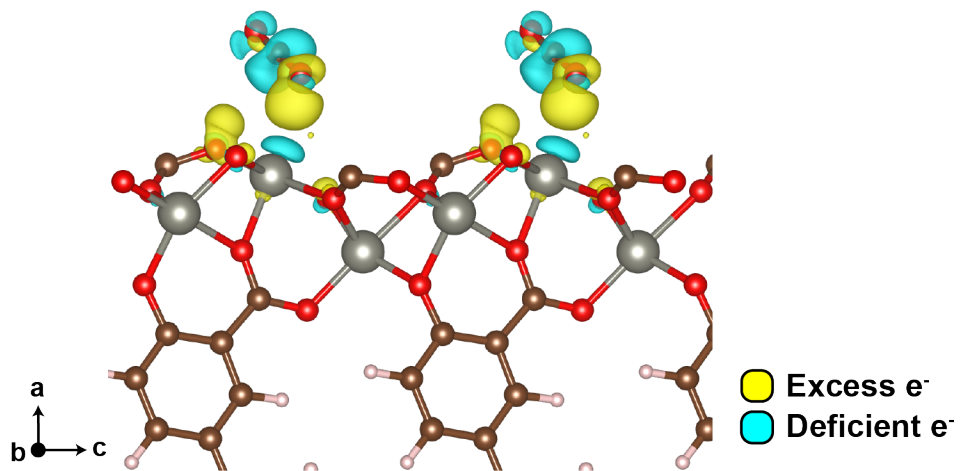

**Fig S8** Isosurface plot of the charge density difference ( $\Delta\rho$ ) for the CO<sub>2</sub> in the Empty geometry. The isosurface level is equal to  $0.005 e/\text{\AA}^3$ .

## References

- 1 R. López and R. Gómez, *J. Sol-Gel Sci. Technol.*, 2012, **61**, 1–7.
- 2 L. Maserati, S. M. Meckler, C. Li and B. A. Helms, *Chem. Mater.*, 2016, **28**, 1581–1588.
- 3 J. Heyd, G. E. Scuseria and M. Ernzerhof, *J. Chem. Phys.*, 2003, **118**, 8207–8215.
- 4 J. D. Pack and H. J. Monkhorst, *Phys. Rev. B*, 1977, **16**, 1748–1749.
- 5 L. Hedin, *Phys. Rev.*, 1965, **139**, A796.
- 6 G. Strinati, H. J. Mattausch and W. Hanke, *Phys. Rev. Lett.*, 1980, **45**, 290–294.
- 7 G. Strinati, H. J. Mattausch and W. Hanke, *Phys. Rev. B*, 1982, **25**, 2867–2888.
- 8 M. S. Hybertsen and S. G. Louie, *Phys. Rev. B*, 1986, **34**, 5390–5413.
- 9 R. W. Godby, M. Schlüter and L. J. Sham, *Phys. Rev. B*, 1988, **37**, 10159–10175.
- 10 F. Aryasetiawan and O. Gunnarsson, *Reports Prog. Phys.*, 1998, **61**, 237–312.
- 11 L. J. Sham and T. M. Rice, *Phys. Rev.*, 1966, **144**, 708–714.
- 12 W. Hanke and L. Sham, *Phys. Rev. Lett.*, 1979, **43**, 387–390.
- 13 M. Rohlfing and S. Louie, *Phys. Rev. Lett.*, 1998, **80**, 3320–3323.
- 14 L. X. Benedict, E. L. Shirley and R. B. Bohn, *Phys. Rev. Lett.*, 1998, **80**, 4514.
- 15 S. Albrecht, L. Reining, R. Del Sole and G. Onida, *Phys. Rev. Lett.*, 1998, **80**, 4510–4513.
- 16 F. Fuchs, J. Furthmüller, F. Bechstedt, M. Shishkin and G. Kresse, *Phys. Rev. B*, 2007, **76**, 115109.
- 17 R. Hill, *Proc. Phys. Soc. Sect. A*, 1952, **65**, 349–354.
- 18 A. Reuss, *ZAMM - Zeitschrift für Angew. Math. und Mech.*, 1929, **9**, 49–58.
- 19 W. Voigt, *Lehrbuch der Kristallphysik*, Teubner, 1966.
- 20 T. M. McDonald, J. A. Mason, X. Kong, E. D. Bloch, D. Gygi, A. Dani, V. Crocellà, F. Giordanino, S. O. Odoh, W. S. Drisdell, B. Vlasisavljevich, A. L. Dzubak, R. Poloni, S. K. Schnell, N. Planas, K. Lee, T. Pascal, L. F. Wan, D. Prendergast, J. B. Neaton, B. Smit, J. B. Kortright, L. Gagliardi, S. Bordiga, J. A. Reimer and J. R. Long, *Nature*, 2015, **519**, 303–308.
- 21 B. Vlasisavljevich, S. O. Odoh, S. K. Schnell, A. L. Dzubak, K. Lee, N. Planas, J. B. Neaton, L. Gagliardi and B. Smit, *Chem. Sci.*, 2015, **6**, 5177–5185.
- 22 D. Gygi, E. D. Bloch, J. A. Mason, M. R. Hudson, M. I. Gonzalez, R. L. Siegelman, T. A. Darwish, W. L. Queen, C. M. Brown and J. R. Long, *Chem. Mater.*, 2016, **28**, 1128–1138.
- 23 R. L. Siegelman, T. M. McDonald, M. I. Gonzalez, J. D. Martell, P. J. Milner, J. A. Mason, A. H. Berger, A. S. Bhowan and J. R. Long, *J. Am. Chem. Soc.*, 2017, **139**, 10526–10538.
